# Supplementary material
Source: publisher site journal article supplement (https://www.dovepress.com/article/322743)
Supplement: Supplementary file 1 [file get_supplementary_file.php]

**Supplementary Table 1: Context sequences of the probes used in genotyping**

| **Genotype** | **SNP ID*** | **Context Sequence [VIC/FAM]** | **Assay ID** |
| --- | --- | --- | --- |
| *CYP2C9*2* | rs1799853 | GATGGGGAAGAGGAGCATTGAGGAC**[C/T]**GTGTTCAAGAGGAAGCCCGCTGCCT | C__25625805_10 |
| *CYP2C9*3* | rs1057910 | TGTGGTGCACGAGGTCCAGAGATAC**[C/A]**TTGACCTTCTCCCCACCAGCCTGCC | C__27104892_10 |
| *VKORC1*2*  (-1639G>A) | rs9934438 | CCCCGACCTCCCATCCTAGTCCAAG**[A/G]**GTCGATGATCTCCTGGCACCGGGCA | C__30204875_10 |
| *CYP4F2*3* | rs2108622 | CCCCGCACCTCAGGGTCCGGCCACA**[C/T]**AGCTGGGTTGTGATGGGTTCCGAAA | C__16179493_40 |
| *FII* | rs5896 | TGCCGCAACCCCGACAGCAGCACCA**[C/T]**GGGACCCTGGTGCTACACTACAGAC | C__11381382_20 |
| *FVII* | rs3093229 | ACAACCAAAGTTTTCCTGTGTCCTC**[C/T]**ACACTCAAGAGTGACTGTGAGGCGG | C__30930559_10 |

*CYP2C9*; cytochrome P450- family 2- subfamily C- member 9, *CYP4F2*; cytochrome P450- family 4- subfamily F- member 2, *FII*; coagulation factor II, *FVII*; coagulation factor VII, *SNP*; single nucleotide polymorphism, *VKORC1*; vitamin K epoxide reductase complex subunit 1.

**Supplementary Table 2: List of performed procedures**

| **The procedure, no. (%)** | **Cohort (N=116)** |
| --- | --- |
| **Minor procedure** | **84 (72.5)** |
| Dental procedure  Endoscopy  Ophthalmology procedure  Valvuloplasty  CAG  Others | 29 (25.0)  19 (16.4)  15 (12.9)  3.0 (2.6)  6.0 (5.2)  12 (10.4) |
| **Major procedure** | **25 (21.5)** |
| Resection  CABG  Knee replacement  MVR  Gastric sleeve  Others | 7.0 (6.0)  6.0 (5.2)  2.0 (1.7)  2.0 (1.7)  2.0 (1.7)  6.0 (5.2) |
| **None*** | **7.0 (6.0)** |

* Some procedures were canceled, CAG; coronary angiography, CABG; coronary artery bypass grafting, MVR; mitral valve replacement.

**Supplementary Table 3: Univariate binary logistic regression displaying genetics and non-genetic influencing INR value of ≤1.2 on the day of the procedure**

| **Predictor** | **Odds ratio** | ***p-*value*** | **95% CI**  **Lower Upper** | |
| --- | --- | --- | --- | --- |
| Age >65 years | 0.52 | 0.11 | 0.24 | 1.16 |
| Weight > 85 kg | 1.8 | 0.12 | 0.85 | 3.79 |
| Holding a Sudanese nationality | 0.29 | 0.08 | 0.07 | 1.19 |
| Patient with diabetes | 0.17 | 0.13 | 0.38 | 3.70 |
| Patient with cancer | 0.34 | 0.15 | 0.08 | 1.47 |
| Taking NSAIDs | 0.28 | 0.14 | 0.05 | 1.51 |
| Taking drug affecting cardiac action potential¥ | 0.36 | 0.01 | 0.15 | 0.82 |
| Using Enoxaparin | 3.04 | 0.006 | 1.42 | 8.29 |
| Enoxaparin dose is >160 mg | 2.65 | 0.07 | 0.92 | 7.63 |
| INR target is ≤3.5 | 7.02 | 0.01 | 1.44 | 34.15 |
| Having AF | 0.36 | 0.01 | 0.17 | 0.79 |
| Having VTE | 4.20 | 0.03 | 1.14 | 15.59 |
| Carrier of reduced function allele of *CYP2C9*3* | 0.23 | 0.01 | 0.07 | 0.77 |
| Carrier of reduced function allele of *FVII* genotype | 1.91 | 0.19 | 0.70 | 5.57 |

**p*-value<0.05; is significant. ¥; B-blockers, Diltiazem, Amiodarone. AF; atrial fibrillation, CI; confidence interval, CYP2C9; cytochrome P450- family 2- subfamily C- member 9, INR; international normalization ratio, NSAIDs; non-steroidal anti-inflammatory drugs, VTE; venous thromboembolism.
